# Supplementary material for: Interleukin 37 promotes angiogenesis through TGF-β signaling
Source: PubMed Central journal article supplement (PMC5522482; doi:10.1038/s41598-017-06124-z), 2017-07-21
Supplement: 41598_2017_6124_MOESM1_ESM.pdf [file 41598_2017_6124_MOESM1_ESM.pdf]

**Interleukin 37 promotes angiogenesis through TGF- $\beta$  signaling****One-sentence summaries:** IL-37 promotes angiogenesis via TGF- $\beta$  signaling

Mengmeng Zhao,<sup>1\*</sup> Yongguang Hu,<sup>1\*</sup> Jiayi Jin,<sup>2</sup> Ying Yu,<sup>2</sup> Shanshan Zhang,<sup>1</sup> Jingjing Cao,<sup>1</sup> Yuanfen Zhai,<sup>1</sup> Rongbin Wei,<sup>1</sup> Juanjuan Shou,<sup>1</sup> Wenping Cai,<sup>1</sup> Shangfeng Liu,<sup>1</sup> Xiaoping Yang,<sup>3</sup> Guo-Tong Xu,<sup>1</sup> Jianhua Yang,<sup>1</sup> David B. Corry,<sup>4</sup> Shao Bo Su,<sup>1,2</sup> Xialin Liu,<sup>2†</sup> Tianshu Yang<sup>1†</sup>

<sup>1</sup>Shanghai Tenth People's Hospital, Tongji University School of Medicine, Shanghai, 200092, China; <sup>2</sup>State Key Laboratory of Ophthalmology, Zhongshan Ophthalmic Center, Sun Yat-sen University, Guangzhou, China; <sup>3</sup>Johns Hopkins University School of Medicine, Baltimore, Unites States; <sup>4</sup>Department of Pathology and Immunology, Baylor College of Medicine, Houston, Unites States

\*These authors contributed equally to this article.

†Corresponding author

Tianshu Yang, PhD, Associate Professor, Shanghai Tenth People's Hospital, Tongji University School of Medicine, Shanghai, China 200092. Tel: 86-21-65986790. Fax: 86-21-65986791. Email: tianshuy@tongji.edu.cn

or

Xialin Liu, MD PhD, Professor, State Key Laboratory of Ophthalmology, Zhongshan Ophthalmic Center, Sun Yat-sen University, Guangzhou, China 510060. Tel: 86-20-87330402. Fax: 86-20-87330403. E-mail: liuxl28@mail.sysu.edu.cn

## SUPPLEMENTAL MATERIAL

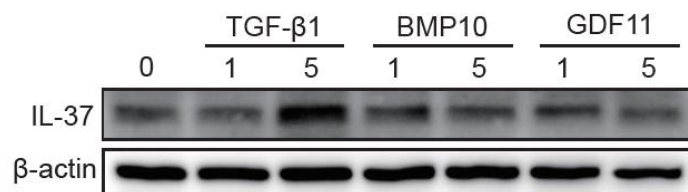

**Figure S1. The effect of TGF- $\beta$  family members on IL-37 expression.** HUVECs were pre-starved under serum-free conditions without supplemented growth factors overnight and then treated with indicated concentrations of factors (TGF- $\beta$ 1, BMP10 and GDF11) for 24 hours. IL-37 expression was examined by Western blot. Blots are representative of three experimental replicates.

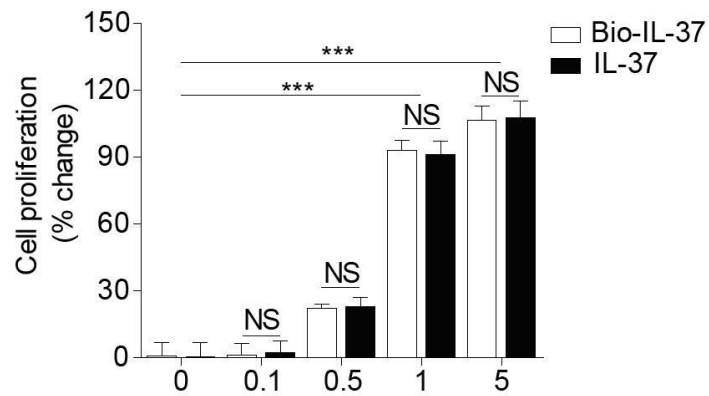

**Figure S2. The bioactivity of biotinylated IL-37 and unbiotinylated IL-37.**

HUVECs were maintained in ECM containing 5% FBS without supplemented growth factors and stimulated with biotin-labeled or unlabeled IL-37 with indicated concentrations for 48 hours. Cell proliferation was determined by BrdU ELISA kit. Data are presented as mean  $\pm$  SEM ( $n = 5$  per group). \*\*\*  $P < 0.01$ . NS, not significant.

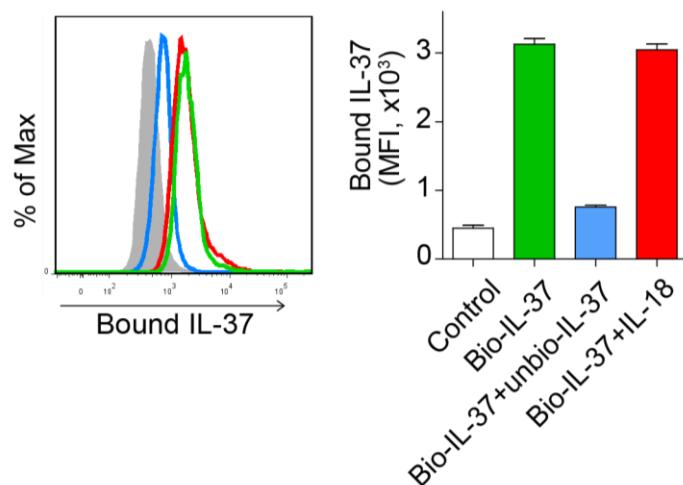

**Figure S3. IL-18 did not compete the binding of IL-37.** HUVECs were incubated with 1  $\mu$ M bio-IL-37 in the presence of 5 $\mu$ M unbiotinylated IL-37 (blue histogram) or unbiotinylated IL-18 (red histogram). Bound biot-IL-37 was determined by flow cytometry using Streptavidin-PE (SAv-PE). Gray histograms indicated cells incubated with SAv-PE alone. The mean fluorescence intensity (MFI) was quantified (n = 4). \*\*\*  $P < 0.01$ ; NS, not significant.

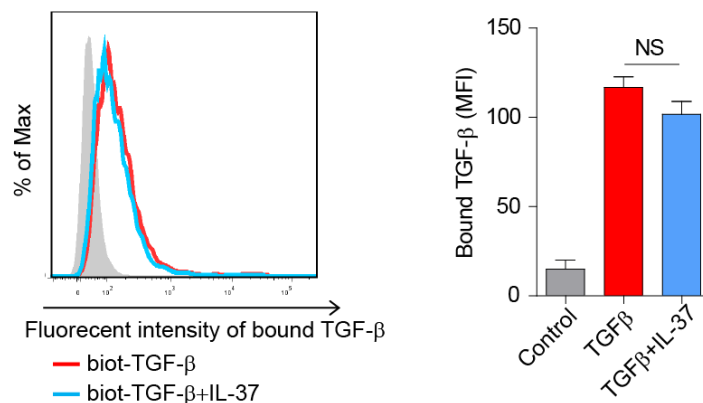

**Figure S4. IL-37 does not affect the binding of TGF- $\beta$  to HUVECs.** IL-37 does not affect the binding of TGF- $\beta$  to HUVECs. HUVECs were incubated with 1  $\mu$ M biot-TGF- $\beta$  in the presence (blue histogram) or absence (red histogram) of 1  $\mu$ M unbiotinylated IL-37. Bound biot-TGF- $\beta$  was determined by flow cytometry using SAv-PE. Gray histograms indicated cells incubated with SAv-PE alone. The mean fluorescence intensity (MFI) was quantified ( $n = 4$ ). NS, not significant.

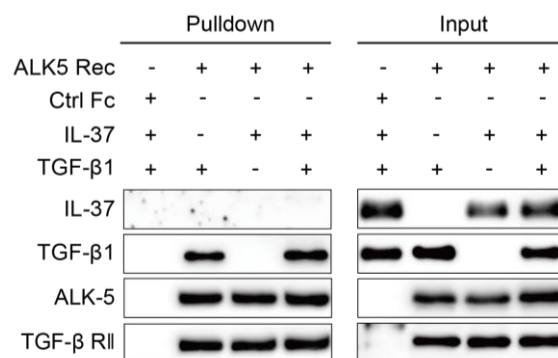

**Figure S5. TGF- $\beta$  does not affect the binding of IL-37 to ALK-5 receptor complex.** The ALK5 receptor complex (pre-incubated ALK5-Fc and TGF- $\beta$  RII-Fc) or control Fc were conjugated to protein A/G beads, which were then incubated with IL-37 in the presence or absence of TGF- $\beta$ 1. Immobilized proteins were resolved by Western Blot. Blots are representative of three experimental replicates.

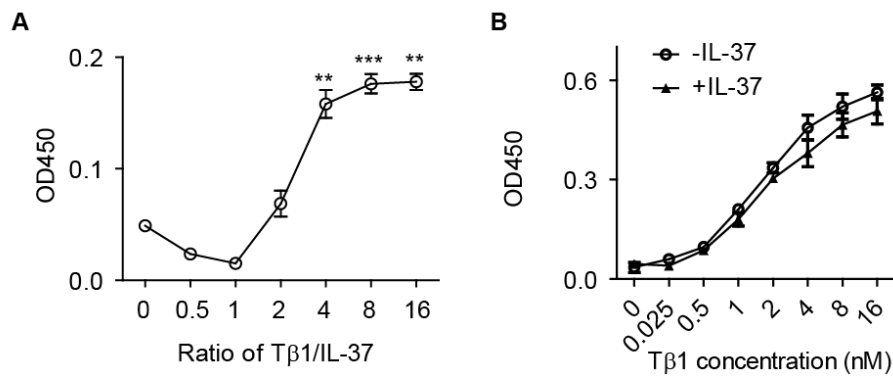

**Figure S6. The binding affinity of TGF- $\beta$  and IL-37 with the ALK1 receptor complex.** (A) The 96-well ELISA plates were coated with the ALK1 receptor complex and then incubated with 5 nmol/l of bio-IL-37 in the presence of increasing concentrations of TGF- $\beta$  (T $\beta$ 1). The binding of IL-37 was detected by Streptavidin-HRP.  $n = 4$ . (B) 96-well ELISA plates were coated with the ALK1 receptor complex and then incubated with increasing concentrations of biotinylated TGF- $\beta$  (biot-T $\beta$ 1) in the presence or absence of 20 nmol/l of IL-37. The binding of biot-TGF- $\beta$ 1 was detected by Streptavidin-HRP.  $n = 4$ . Data were presented as mean  $\pm$  SEM ( $n = 4$  per group). \*\*  $P < 0.01$ ; \*\*\*  $P < 0.001$ .

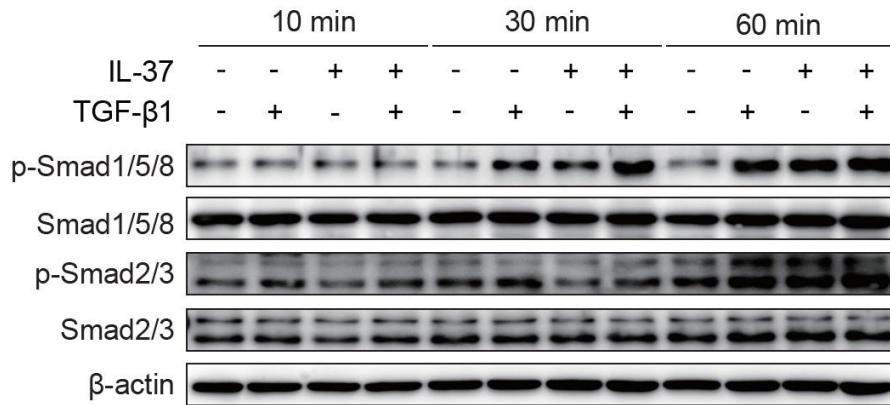

**Figure S7. IL-37 and TGF- $\beta$ 1 synergistically stimulated phosphorylation of Smad1/5/8 rather than Smad2/3.** HUVECs were pre-starved under serum-free conditions without supplemented growth factors overnight and then treated with IL-37 in the presence or absence of TGF- $\beta$ 1 for indicated time (10 min, 30 min and 60min). Phosphorylated Smad1/5/8 and Smad2/3 were determined by Western blot. Blots are representative of three experimental replicates.



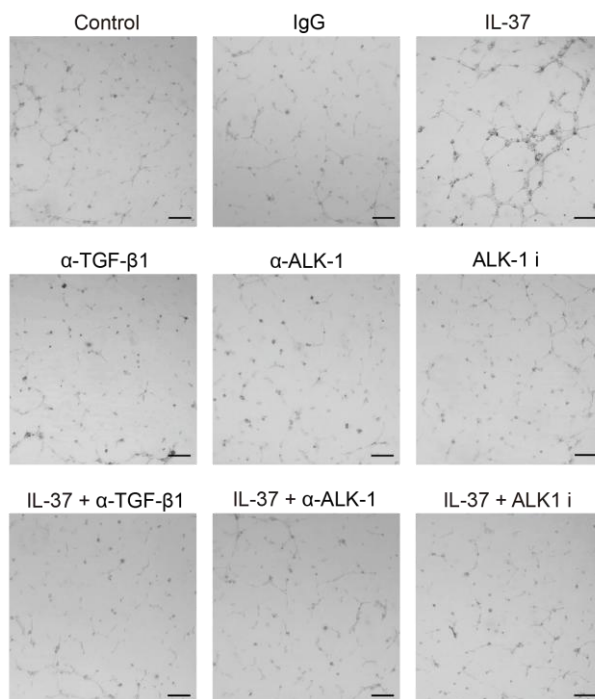

**Figure S8. IL-37 promotes tube formation of HUVECs through TGF-ALK1 signaling.** HUVECs were stimulated with IL-37 (1 ng/ml) in present or absent TGF- $\beta$ 1 antibody (10  $\mu$ g/ml), ALK-1 antibody (10  $\mu$ g/ml) and ALK-1 inhibitor (0.5  $\mu$ M) for 12 hours. Representative images of tube structure were shown. Scale bars, 100  $\mu$ m.

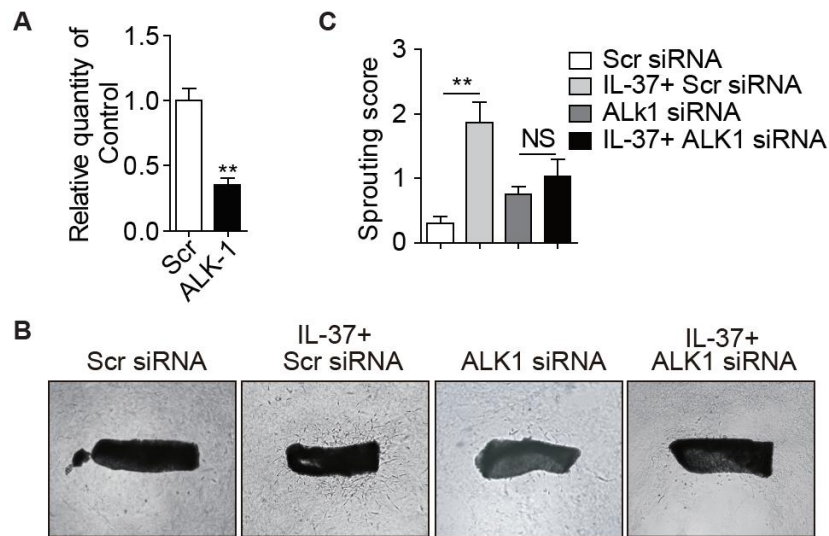

**Figure S9. Knockdown of ALK1 reduced IL-37 (1 ng/mL) stimulated vessel growth from aortic rings. (A)** Mouse aortic rings were transfected with 120 nmol/l scrambled siRNA or 120 nmol/l siALK1 composed of 40 nmol/l of the three antisense sequences using Lipofectamin RNAiMAX (Invitrogen) according to manufacturer's instructions. After overnight transfection, mRNA was isolated and *Alk1* mRNA level was quantified by quantitative PCR. Data were presented as mean  $\pm$  SEM ( $n = 5$  per group). \*\* $P < 0.01$ . **(B)** Knockdown of ALK1 by siRNA inhibited IL-37-stimulated vessel growth from aortic rings. **(C)** Aggregate analysis of the sprouting.  $n = 10$  per group. Data are presented as mean  $\pm$  SEM. \*\*  $P < 0.01$ . NS, not significant.

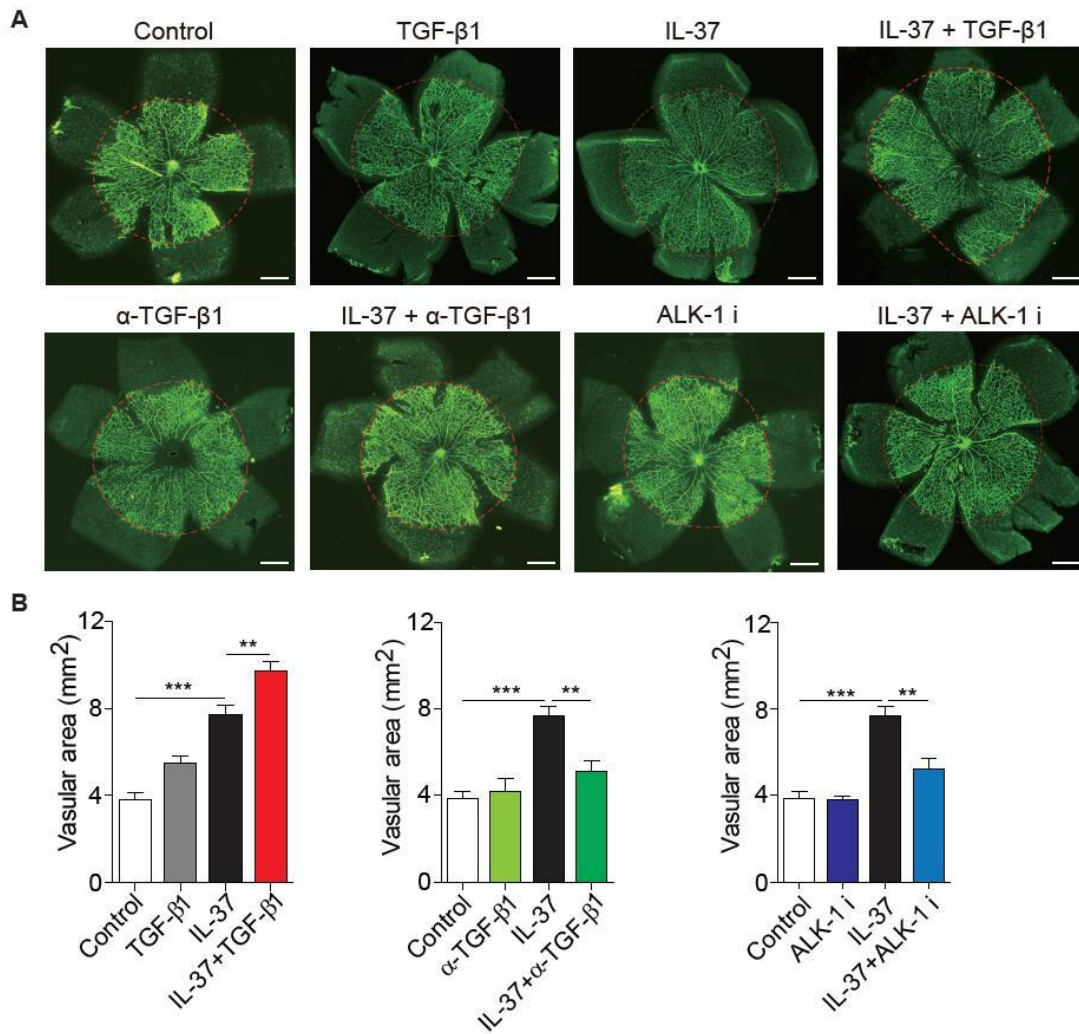

**Figure S10. IL-37 promoted developmental angiogenesis through TGF- $\beta$  signaling.** (A) Neonatal mice were administrated with IL-37 (1 ng/g bodyweight) with or without TGF- $\beta$ 1 (1 ng/g bodyweight) from postnatal day 1 to day 4. For blockade of TGF- $\beta$ 1 or ALK1, TGF- $\beta$ 1 neutralizing antibodies was administrated intraocularly at 0.5  $\mu$ g per eye and ALK1 inhibitor LDN193189 was administrated intraperitoneally at 2 mg/kg bodyweight. (n = 10 per group). (B) Vascular area of the retina whole mounts was assessed. Scale bars, 500  $\mu$ m. Data are presented as mean  $\pm$  SEM. \*  $P < 0.05$ , \*\*  $P < 0.01$  and \*\*\*  $P < 0.001$ .

**Additional Tables****Table S1. siRNA sequences targeting ALK1**

| Primer name  | Sense (5'-3')       | antiense (3'-5')    |
|--------------|---------------------|---------------------|
| ALK1_mouse_1 | TGGTAGAGTGTGTGGGAAA | TTTCCCACACACTCTACCA |
| ALK1_mouse_2 | CAGGAGAAGCAGCGGGATT | AATCCCGCTGCTTCTCCTG |
| ALK1_mouse_3 | CCAGAGAAGCCCAAAGTGA | TCACTTTGGGCTTCTCTGG |

**Table S2. Primer sequences of real-time quantitative PCR**

| Primer name          | Sequence (5' to 3')       |
|----------------------|---------------------------|
| h $\beta$ -actin_For | TTCCATATCGTCCCAGTTGGT     |
| h $\beta$ -actin_Rev | CCAGGGCGTTATGGTAGGCA      |
| m $\beta$ -actin For | GCTCGTTGCCAATAGTGATGACC   |
| m $\beta$ -actin Rev | TGAGAGGGAAATCGTGCGTGAC    |
| mALK1_For            | GGCCTTTTGATGCTGTCTG       |
| mALK1_Rev            | ATGACCCCTGGCAGAATG        |
| hld1_For             | TTCCTCTGGTTGACTGTTGTTCTTC |
| hld1_Rev             | CTCTCTAAACTCCCTACGCCTTGTT |
| hld3_For             | GGAGCTTTTGCCACTGACTCG     |
| hld3_Rev             | CTCCAGGAAGGGATTTGGTGAAGT  |
